# Supplementary material for: MARGINAL: An Automatic Classification of Variants in BRCA1 and BRCA2 Genes Using a Machine Learning Model
Source: MDPI journal article supplement (doi:10.3390/biom12111552), 2022-10-24
Supplement: s1 [file s1]

Article

# MARGINAL: An Automatic Classification of Variants in *BRCA1* and *BRCA2* Genes Using a Machine Learning Model

Vasiliki Karalidou <sup>1,\*</sup>, Despoina Kalfakakou <sup>2</sup>, Athanasios Papathanasiou <sup>2</sup>, Florentia Fostira <sup>2</sup> and George K. Matsopoulos <sup>1</sup>

<sup>1</sup> School of Electrical and Computer Engineering, National Technical University of Athens, 15780 Athens, Greece

<sup>2</sup> Molecular Diagnostics Laboratory, INRaSTES, National Center for Scientific Research NCSR Demokritos, 15341 Athens, Greece

\* Correspondence: vasokaralidou@yahoo.gr

## Supplementary Materials

**Table S1.** Misclassified variants predicted by eight ML algorithms for classifier 1 based on the test set provided by CanVaS database.

| ML Algorithms | Variant Location          |
|---------------|---------------------------|
| LR            | 13:g.32893172T>C          |
|               | 13:g.32893344A>G          |
|               | 13:g.32899271T>A          |
|               | 13:g.32903606_32903607del |
|               | 13:g.32911193C>G          |
|               | 13:g.32911300_32911303del |
|               | 13:g.32911436A>C          |
|               | 13:g.32911614G>C          |
| LDA           | 13:g.32911628G>A          |
|               | 13:g.32893172T>C          |
|               | 13:g.32893344A>G          |
|               | 13:g.32899271T>A          |
|               | 13:g.32903606_32903607del |
|               | 13:g.32911193C>G          |
|               | 13:g.32911300_32911303del |
|               | 13:g.32911436A>C          |
|               | 13:g.32911614G>C          |
|               | 13:g.32911628G>A          |

|             |                            |
|-------------|----------------------------|
| KNN         | 13:g.32893344A>G           |
|             | 13:g.32899271T>A           |
|             | 13:g.32903606_32903607del  |
|             | 13:g.32906834C>G           |
|             | 13:g.32906957C>T           |
|             | 13:g.32911193C>G           |
|             | 13:g.32911300_32911303del  |
|             | 13:g.32911436A>C           |
|             | 13:g.32911565A>G           |
|             | 13:g.32911614G>C           |
|             | 13:g.32911628G>A           |
|             |                            |
| CART        | 13:g.32893344A>G           |
|             | 13:g.32899271T>A           |
|             | 13:g.32903606_32903607del  |
|             | 13:g.32907401G>C           |
|             | 13:g.32911193C>G           |
|             | 13:g.32911300_32911303del  |
|             | 13:g.32911436A>C           |
|             | 13:g.32911614G>C           |
| BernoulliNB | 13:g.32911628G>A           |
|             |                            |
|             | 13:g.32893344A>G           |
|             | 13:g.32893390A>C           |
|             | 13:g.32899271T>A           |
|             | 13:g.32907147C>A           |
|             | 13:g.32907502_32907503insA |
|             | 13:g.32911193C>G           |
|             | 13:g.32911300_32911303del  |
|             | 13:g.32911628G>A           |
|             |                            |
|             | 13:g.32893344A>G           |
|             | 13:g.32899271T>A           |
|             | 13:g.32903606_32903607del  |
|             | 13:g.32906834C>G           |

|     |                            |
|-----|----------------------------|
| SVM | 13:g.32906957C>T           |
|     | 13:g.32907502_32907503insA |
|     | 13:g.32911193C>G           |
|     | 13:g.32911300_32911303del  |
|     | 13:g.32911436A>C           |
| RF  | 13:g.32911628G>A           |
|     | 13:g.32893344A>G           |
|     | 13:g.32899271T>A           |
|     | 13:g.32903606_32903607del  |
|     | 13:g.32911193C>G           |
| MLP | 13:g.32911300_32911303del  |
|     | 13:g.32911436A>C           |
|     | 13:g.32911614G>C           |
|     | 13:g.32911628G>A           |
|     | 13:g.32893344A>G           |
|     | 13:g.32899271T>A           |
|     | 13:g.32903606_32903607del  |
|     | 13:g.32911193C>G           |
|     | 13:g.32911300_32911303del  |
|     | 13:g.32911436A>C           |
|     | 13:g.32911614G>C           |
|     | 13:g.32911628G>A           |

**Table S2.** Misclassified variants predicted by eight ML algorithms for classifier 2 based on the test set provided by CanVaS database.

| ML Algorithms | Variant Location                              |
|---------------|-----------------------------------------------|
| LR            | 13:g.32906732C>T                              |
| LDA           | 13:g.32906732C>T<br>13:g.32907020_32907021del |
| KNN           | 13:g.32906732C>T<br>13:g.32907020_32907021del |
| CART          | 13:g.32893474A>G<br>13:g.32906732C>T          |
| BernoulliNB   | 13:g.32906732C>T                              |
| SVM           | 13:g.32906732C>T<br>13:g.32907020_32907021del |
| RF            | 13:g.32893474A>G<br>13:g.32906732C>T          |
| MLP           | 13:g.32893474A>G<br>13:g.32906732C>T          |

**Table S3.** The total number of final labels predicted by the best ML algorithms (e.g., RF for classifier 1 and LR for classifier 2) for each class based on CanVaS database and the total number of labels provided by ClinVar database.

| Classifier | Classes        | Total Final Predicted Labels | Total ClinVar Labels |
|------------|----------------|------------------------------|----------------------|
| 1          | Other variants | 64                           | 53                   |
|            | VUS            | 36                           | 47                   |
| 2          | B/LB           | 37                           | 27                   |
|            | P/LP           | 37                           | 25                   |
|            | VUS            | -                            | 22                   |
